# Supplementary material for: Impact of perinatal environmental health education intervention on exposure to endocrine disruptors during pregnancy—PREVED study: study protocol for a randomized controlled trial
Source: PubMed Central journal article supplement (PMC8642981; doi:10.1186/s13063-021-05813-5), 2021-12-04
Supplement: 13063_2021_5813_MOESM1_ESM.pdf [file 13063_2021_5813_MOESM1_ESM.pdf]

Additional File 1: World Health Organization - Trial Registration Data Set

| Data Category                                 | Information                                                                                                                                                                                                                                                                                                                                                                                                              |
|-----------------------------------------------|--------------------------------------------------------------------------------------------------------------------------------------------------------------------------------------------------------------------------------------------------------------------------------------------------------------------------------------------------------------------------------------------------------------------------|
| Primary Registry and Trial Identifying Number | PREVED: NCT03233984                                                                                                                                                                                                                                                                                                                                                                                                      |
| Date of Registration in Primary Registry      | 31 July 2017                                                                                                                                                                                                                                                                                                                                                                                                             |
| Source(s) of Monetary or Material Support     | <i>"Fondation de France"</i>                                                                                                                                                                                                                                                                                                                                                                                             |
| Primary Sponsor                               | University Hospital of Poitiers                                                                                                                                                                                                                                                                                                                                                                                          |
| Contact for Public Queries                    | Houria El Ouazzani: houria.el.fellah.el.ouazzani@univ-poitiers.fr                                                                                                                                                                                                                                                                                                                                                        |
| Contact for Scientific Queries                | Marion Albouy-Llaty: marion.albouy-llaty@chu-poitiers.fr                                                                                                                                                                                                                                                                                                                                                                 |
| Public Title                                  | The PREVED Study                                                                                                                                                                                                                                                                                                                                                                                                         |
| Scientific Title                              | Impact of perinatal environmental health education intervention on exposure to endocrine disruptors during pregnancy - PREVED study: protocol for a randomized controlled trial                                                                                                                                                                                                                                          |
| Countries of Recruitment                      | FRANCE                                                                                                                                                                                                                                                                                                                                                                                                                   |
| Health Condition(s) or Problem(s) Studied     | Exposure to endocrine disruptors                                                                                                                                                                                                                                                                                                                                                                                         |
| Intervention(s)                               | <p><u>Three groups:</u></p> <ul style="list-style-type: none"> <li>- A control group: Group (1)</li> <li>- An intervention group in neutral location: Group (2)</li> <li>- An intervention group in contextualized location: Group (3)</li> </ul> <p><u>Intervention:</u> Three workshops held between the second and the third trimesters of pregnancy on: Indoor air quality, Nutrition and Personal care products</p> |

|                                                    |                                                                                                                                                                                                                                                                                                                                                                                                                                                                                                                                                                                                                                                                                                                                                                                                                                                                                                                                                                                                                                                                                                                                                                                                                                                                                                                                                                                                                        |
|----------------------------------------------------|------------------------------------------------------------------------------------------------------------------------------------------------------------------------------------------------------------------------------------------------------------------------------------------------------------------------------------------------------------------------------------------------------------------------------------------------------------------------------------------------------------------------------------------------------------------------------------------------------------------------------------------------------------------------------------------------------------------------------------------------------------------------------------------------------------------------------------------------------------------------------------------------------------------------------------------------------------------------------------------------------------------------------------------------------------------------------------------------------------------------------------------------------------------------------------------------------------------------------------------------------------------------------------------------------------------------------------------------------------------------------------------------------------------------|
| <p><b>Key Inclusion and Exclusion Criteria</b></p> | <p><u>Inclusion criteria:</u></p> <ul style="list-style-type: none"> <li>- pregnant women with declared pregnancy</li> <li>- speaking French</li> <li>- being aged 18 years or more</li> <li>- living in the French department of Vienne and at less than 30 minutes from the contextualized space: community of agglomeration of Poitiers, ex-cantons of Saint-Georges-lès-Baillargeaux, Vouneuil-sur-Vienne, Saint-Julien-l'ars, Vouillé, Neuville, Chauvigny, La Villedieu-du-Clain, Vivonne</li> <li>- having the intention to give birth in the maternity of the University Hospital, of the clinic "Fief de Grimoire" in Poitiers or in the Hospital of Châtellerault</li> <li>- having signed a consent form</li> </ul> <p><u>Exclusion criteria:</u></p> <ul style="list-style-type: none"> <li>- pregnant women expecting twins or more</li> <li>- having a complicated pregnancy</li> <li>- not speaking French</li> <li>- being under 18 years old or under legal protection despite being 18 or more</li> <li>- being deprived of liberty by judicial or administrative decision</li> <li>- undergoing psychiatric treatment</li> <li>- not being affiliated to a social security system</li> <li>- intending to move out during the next year</li> <li>- having the intention to give birth in a maternity ward other than the department of Vienne</li> <li>- being unable to express consent</li> </ul> |
| <p><b>Study Type</b></p>                           | <p>Open-label, monocentric, randomized controlled superiority trial</p>                                                                                                                                                                                                                                                                                                                                                                                                                                                                                                                                                                                                                                                                                                                                                                                                                                                                                                                                                                                                                                                                                                                                                                                                                                                                                                                                                |
| <p><b>Date of First Enrolment</b></p>              | <p>April 2017</p>                                                                                                                                                                                                                                                                                                                                                                                                                                                                                                                                                                                                                                                                                                                                                                                                                                                                                                                                                                                                                                                                                                                                                                                                                                                                                                                                                                                                      |

|                               |                                                                                                                                                                                                                                                                                 |
|-------------------------------|---------------------------------------------------------------------------------------------------------------------------------------------------------------------------------------------------------------------------------------------------------------------------------|
| <b>Sample Size</b>            | 273                                                                                                                                                                                                                                                                             |
| <b>Recruitment Status</b>     | Closed                                                                                                                                                                                                                                                                          |
| <b>Primary Outcome(s)</b>     | Percentage of participants who reported consuming manufactured or industrial food                                                                                                                                                                                               |
| <b>Key Secondary Outcomes</b> | <p>Mean score of psychosocial questionnaire</p> <p>Concentrations of BPA, chlorinated derivatives of bisphenol A, methyl-, ethyl-, propyl- and butyl-paraben in Urine and Colostrum</p> <p>Percentage of participants who reported consuming PB-free personal care products</p> |
| <b>Ethics Review</b>          | <p>Approved by the Ethics Committee of the University Hospital of Poitiers (France)</p> <p>Approved by the Committee for Personal Protection (CPP) – Ouest III</p>                                                                                                              |
| <b>Completion date</b>        | The end of 2020                                                                                                                                                                                                                                                                 |
