# Supplementary material for: Impact of perinatal environmental health education intervention on exposure to endocrine disruptors during pregnancy—PREVED study: study protocol for a randomized controlled trial
Source: Springer Nature journal article supplement (doi:10.1186/s13063-021-05813-5), 2021-12-01
Supplement: MOESM3 [file 19932670]

**Additional file 3: Study Period**

|                                     | <b>Closed (2019)</b> | <b>Ongoing</b> | <b>Expected in 2021</b> |
|-------------------------------------|----------------------|----------------|-------------------------|
| <b>Enrolment</b>                    | x                    |                |                         |
| <b>Home Visit 1: Questionnaires</b> | x                    |                |                         |
| <b>Home Visit 2: Questionnaires</b> | x                    |                |                         |
| <b>Home Visit 3: Questionnaires</b> |                      | x              |                         |
| <b>Urine and Colostrum Analysis</b> |                      | x              |                         |
| <b>Statistical Analysis</b>         |                      |                | x                       |
